# Supplementary material for: Effectiveness of transverse tibial bone transport in treatment of diabetic foot ulcer: A systematic review and meta-analysis
Source: Front Endocrinol (Lausanne). 2023 Jan 4;13:1095361. doi: 10.3389/fendo.2022.1095361 (PMC9846025; doi:10.3389/fendo.2022.1095361)
Supplement: Supplementary file 1 [file DataSheet_1.doc]

| **Table S1. Study quality of included studies** | | | | | | | | | | | | | | | | | | | | | | |
| --- | --- | --- | --- | --- | --- | --- | --- | --- | --- | --- | --- | --- | --- | --- | --- | --- | --- | --- | --- | --- | --- | --- |
| 1. Quality assessment of case-control studies based on the Newcastle-Ottawa scale | | | | | | | | | | | | | | | | | | | | | | |
| **Study ID** | | **D1a** | | **D2a** | | | **D3a** | | **D4a** | | **D5a** | | **D6a** | | | **D7a** | | | **D8a** | | | **Total score** |
| Ding XF, 2022 [16] | | * | | * | | | * | | * | | * | | * | | | * | | |  | | | 7 |
| Zeng ZS, 2019 [18] | | * | | * | | | * | | * | | ** | | * | | | * | | | * | | | 9 |
| Chen Y, 2019 [19] | | * | | * | | | * | | * | | ** | | * | | | * | | | * | | | 9 |
| Fan ZQ, 2022 [20] | | * | | * | | | * | | * | | ** | | * | | |  | | | * | | | 8 |
| 1. Quality assessment of randomized controlled trials based on the Cochrane Collaboration tool | | | | | | | | | | | | | | | | | | | | | | |
| **Study ID** | | **D1b** | | | | **D2b** | | | **D3b** | | **D4b** | | | **D5b** | | | **D6b** | | | **D7b** | | |
| Ou SJ, 2022 [3] | |  | | | |  | | |  | |  | | |  | | |  | | |  | | |
| 1. Quality assessment of case series study based on the JBI-MAStARI scale | | | | | | | | | | | | | | | | | | | | | | |
| **Study ID** | **D1c** | | **D2c** | | **D3c** | | | **D4c** | | **D5c** | | **D6c** | | | **D7c** | | | **D8c** | | | **D9c** | |
| Fan ZQ, 2020 [15] |  | |  | |  | | |  | |  | |  | | |  | | |  | | |  | |
| Yuan YS, 2021 [17] |  | |  | |  | | |  | |  | |  | | |  | | |  | | |  | |

**Domains:** (1) D1a: Is the case definition adequate; D2a: Representativeness of the cases; D3a: Selection of the controls; D4a: Definition of controls; D5a: Comparability of cases and controls on the basis of the design or analysis; D6a: Ascertainment of exposure; D7a: Same method of ascertainment for cases and controls; D8a: Non-response rate. **(2)** D1b: Random sequence generation (selection bias); D2b: Allocation concealment (selection bias); D3b: Blinding of participants and personnel (performance bias); D4b: Blinding of outcome assessment (detection bias); D5b: Incomplete outcome data (attrition bias); D6b: Selective reporting (reporting bias); D7b: Other bias. low risk of bias; high risk of bias; unclear. (3) D1c: whether the study is based on random or quasi-random samples; D2c: whether the inclusion criteria are clear; D3c: confounding factor control; D4c: whether the outcome measure is objective; D5c: if comparison is made, whether the characteristics of each group of samples are adequately stated; D6c: whether the follow-up time was sufficient; D7c: whether the outcome of the drop-out case is stated; D8c: whether the outcome measure is reliable; D9c: whether the statistical analysis method is appropriate.
